# Supplementary material
Source: PubMed Central journal article supplement (PMC3613966)
Supplement: Supp_Data.pdf [file Supp_Data.pdf]

## Supplementary Data

### Supplementary Materials and Methods

For suspension culture of high side scatter (SSC<sup>high</sup>) human dermal stem/progenitor cells (hDSPCs), the enriched SSC<sup>high</sup>-hDSPCs were resuspended in the Dulbecco's modi-

fied Eagle's medium/F12 (3:1; Invitrogen) containing 100 U/mL penicillin and 100 µg/mL streptomycin, 40 ng/mL FGF2, 20 ng/mL EGF (from R&D Systems), and B27 (Invitrogen) and then transferred to a HydroCell™ 3.5-cm Dish (Nunc). The cells were grown at 37°C in 5% CO<sub>2</sub> for 3 days.

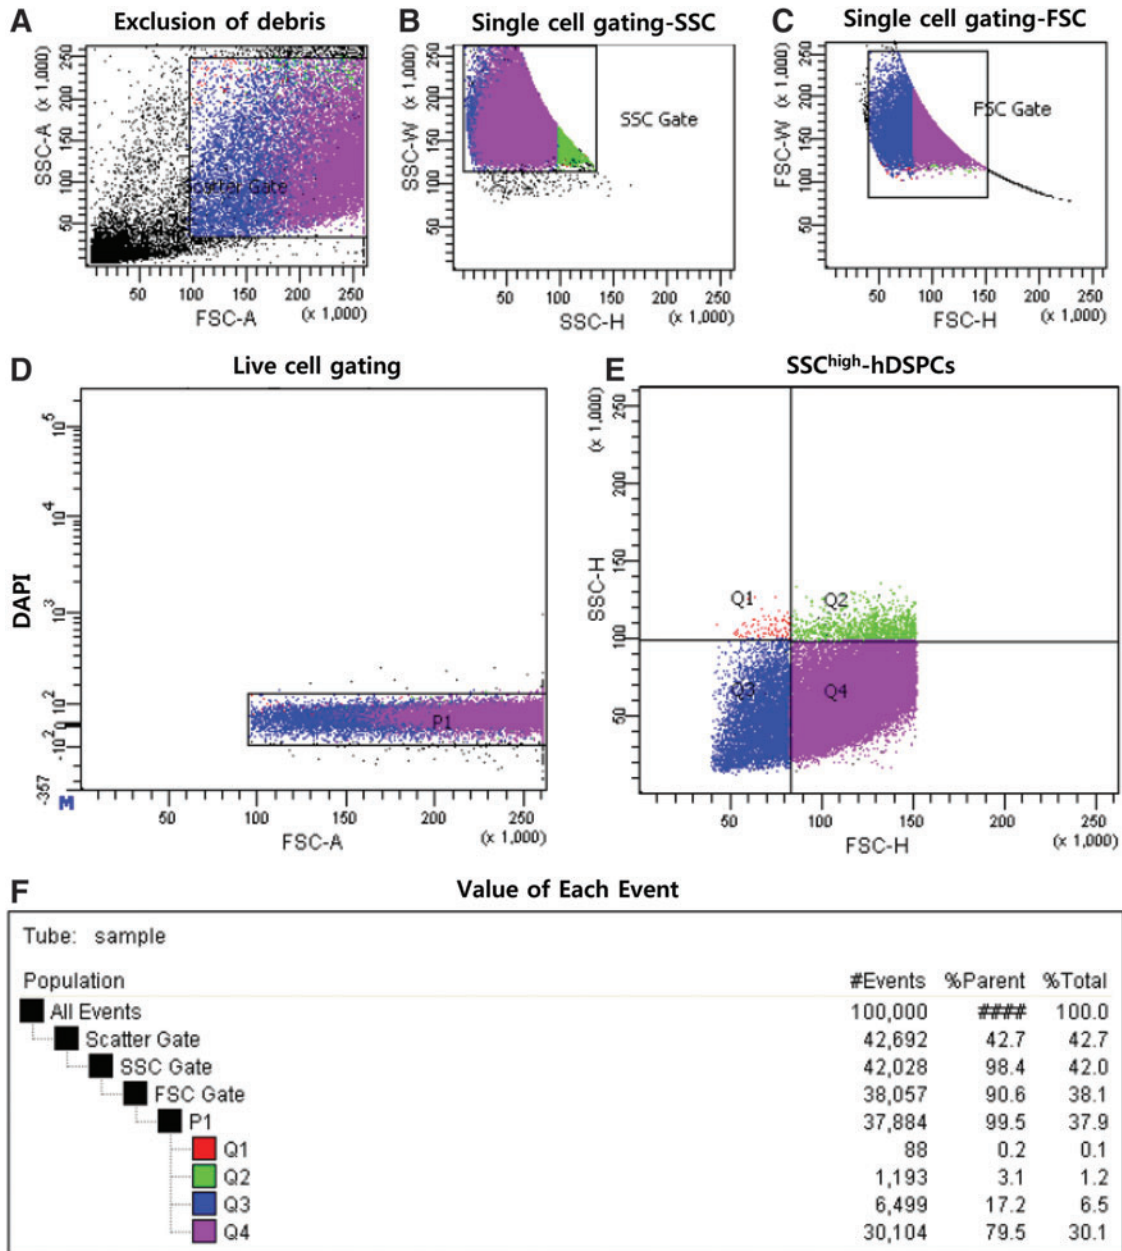

**SUPPLEMENTARY FIG. S1.** Purification of a SSC<sup>high</sup>-hDSPC-enriched fraction. Cells were analyzed by flow cytometry as follows: (A) Cell debris was excluded at low and high extremes of FSC and SSC. (B, C) Doublets were excluded first by SSC and then by FSC-based time-of-flight analysis. (D) DAPI-positive (dead) cells were excluded. (E) Cells were divided into 4 groups (Q1: FSC<sup>low</sup>SSC<sup>high</sup>, Q2: FSC<sup>high</sup>SSC<sup>high</sup>, Q3: FSC<sup>low</sup>SSC<sup>low</sup>, and Q4: FSC<sup>high</sup>SSC<sup>low</sup>). (F) Both the cell number and percentage of each event versus percentage of total NHDFs are shown. A representative sample is shown ( $n=3$ ). DSPCs, human dermal stem/progenitor cells; FSC, forward scatter; SSC, side scatter; NHDFs, normal human dermal fibroblasts; DAPI, 4',6-diamidino-2-phenylindole dihydrochloride.

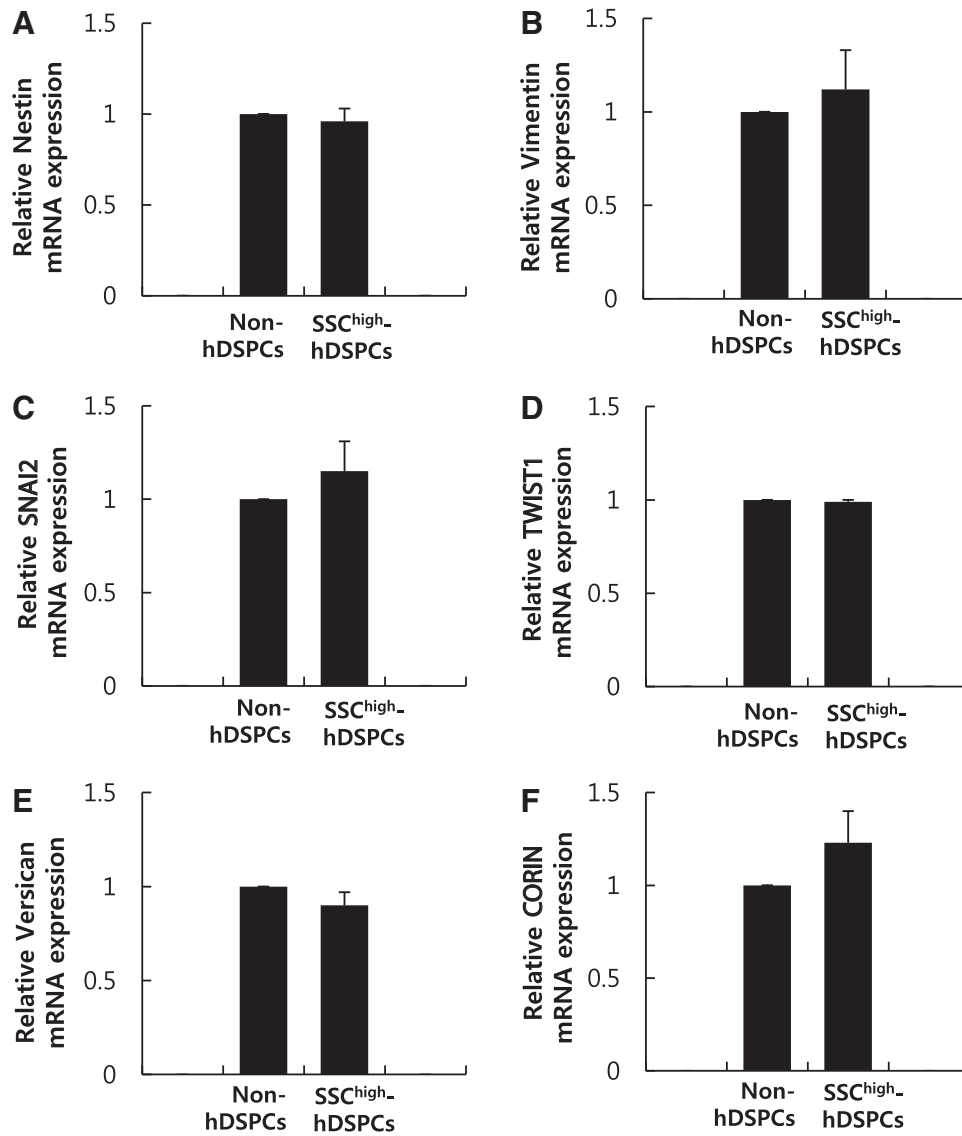

**SUPPLEMENTARY FIG. S2.** Characterization of SSC<sup>high</sup>-hDSPCs. Real-time RT-PCR analysis of the SKP markers, (A) nestin, (B) vimentin, (C) *SNAI2* and (D) *TWIST1*, and the markers of dermal papillae, (E) versican and (F) *CORIN*. The data represent the mean±SD of triplicate runs. RT-PCR, reverse transcription-polymerase chain reaction; SKPs, skin-derived progenitors; SD, standard deviation.

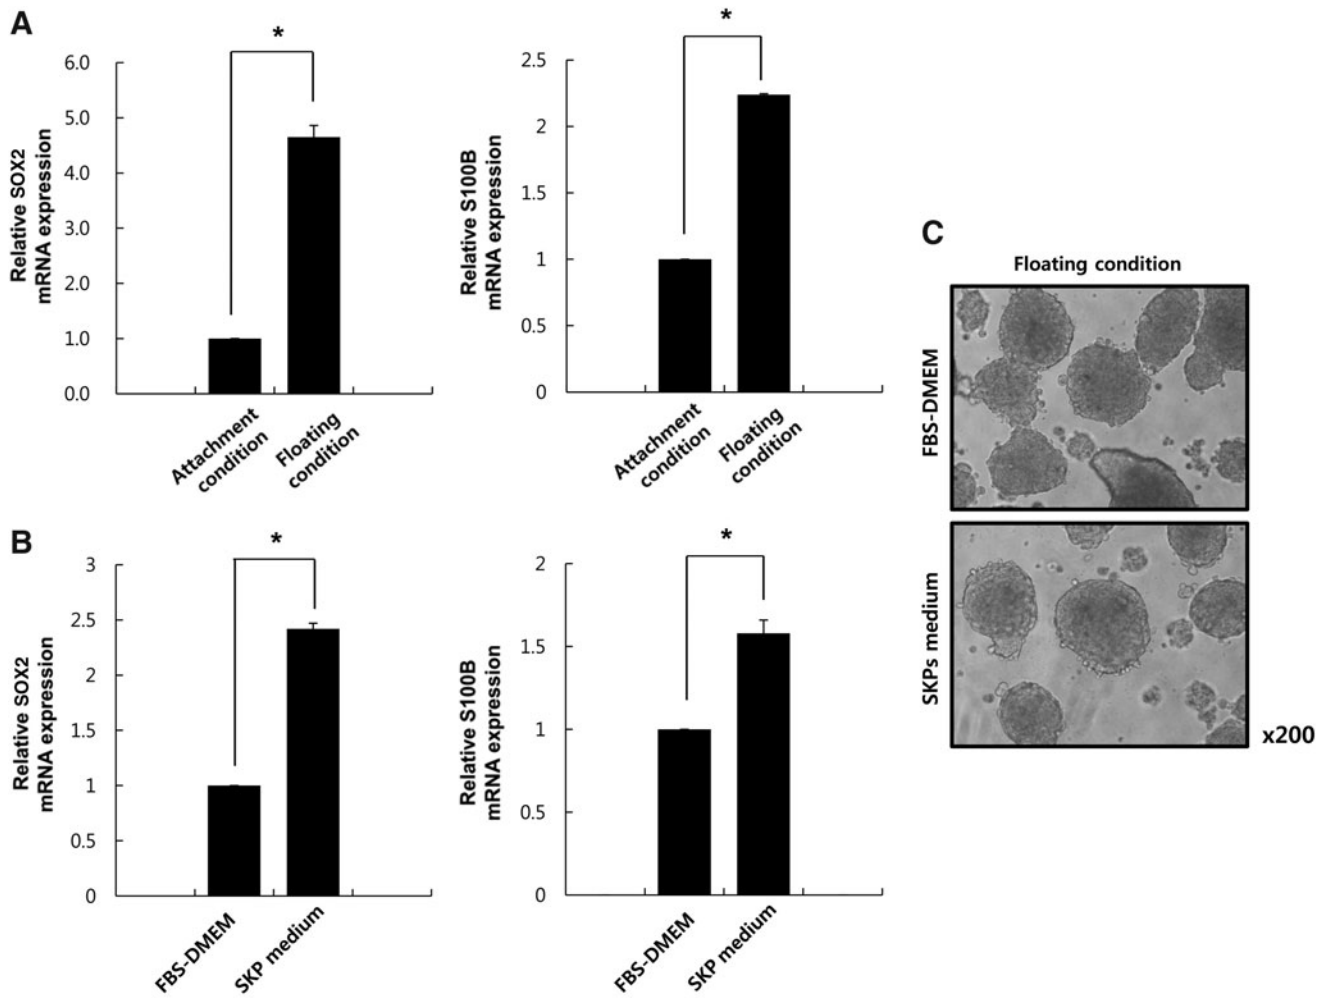

**SUPPLEMENTARY FIG. S3.** Comparison of conditions for maintenance of SSC<sup>high</sup>-hDSPC stemness. Real-time RT-PCR analysis revealed upregulation of *SOX2* and *S100B* mRNA expression. **(A)** SSC<sup>high</sup>-hDSPCs were grown in 10% FBS-DMEM under an adherent and floating condition. **(B)** SSC<sup>high</sup>-hDSPCs on a HydroCell™ plate was maintained under the 10% FBS-DMEM and SKP medium, respectively. **(C)** Phase-contrast microscope images of SSC<sup>high</sup>-hDSPCs on the HydroCell™ plate were shown under the 10% FBS-DMEM (*upper panel*) and SKP medium (*lower panel*), respectively. The data represent the mean ± SD of triplicate runs. \**P* < 0.01. FBS, fetal bovine serum; DMEM, Dulbecco's modified Eagle's medium.

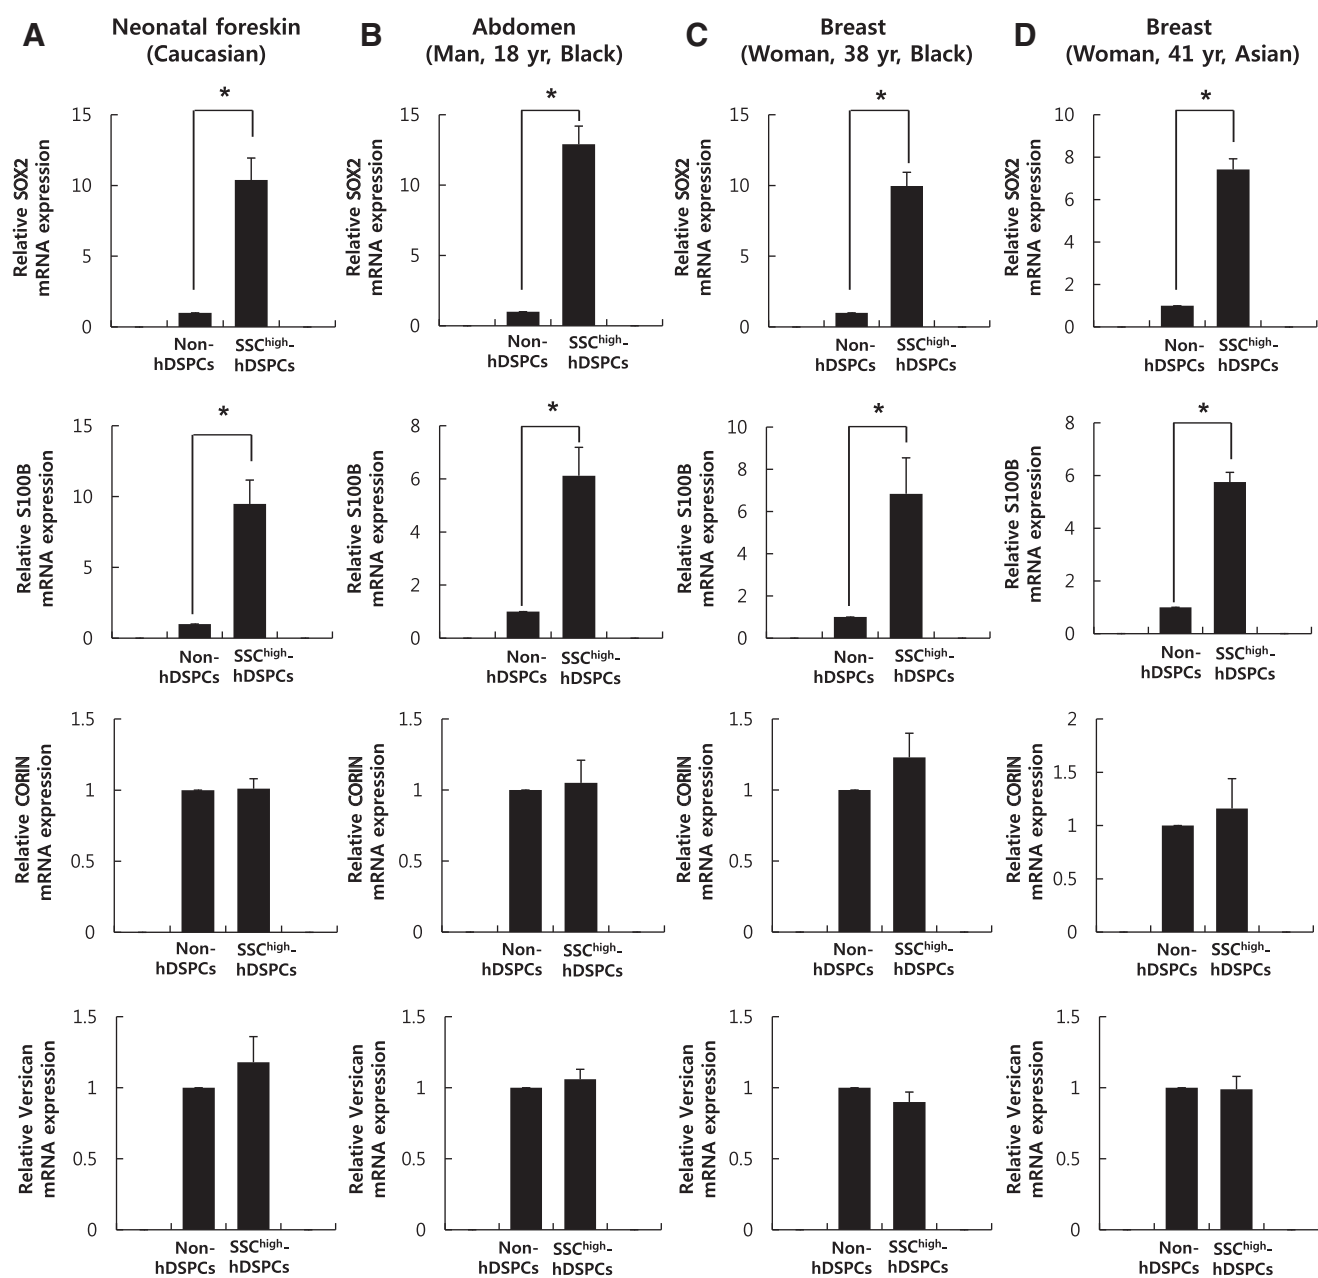

**SUPPLEMENTARY FIG. S4.** Characterization of SSC<sup>high</sup>-hDSPCs from different origins. Real-time RT-PCR analysis of SKP markers, *SOX2* and *S100B*, and markers of dermal papillae, *CORIN* and versican. **(A)** Neonatal foreskin (Caucasian), **(B)** abdomen (man, 18 years, Black), **(C)** breast (woman, 38 years, Black), and **(D)** breast (woman, 41 years, Asian). The data represent the mean  $\pm$  SD of independent experiments run in triplicate. \* $P < 0.01$ .

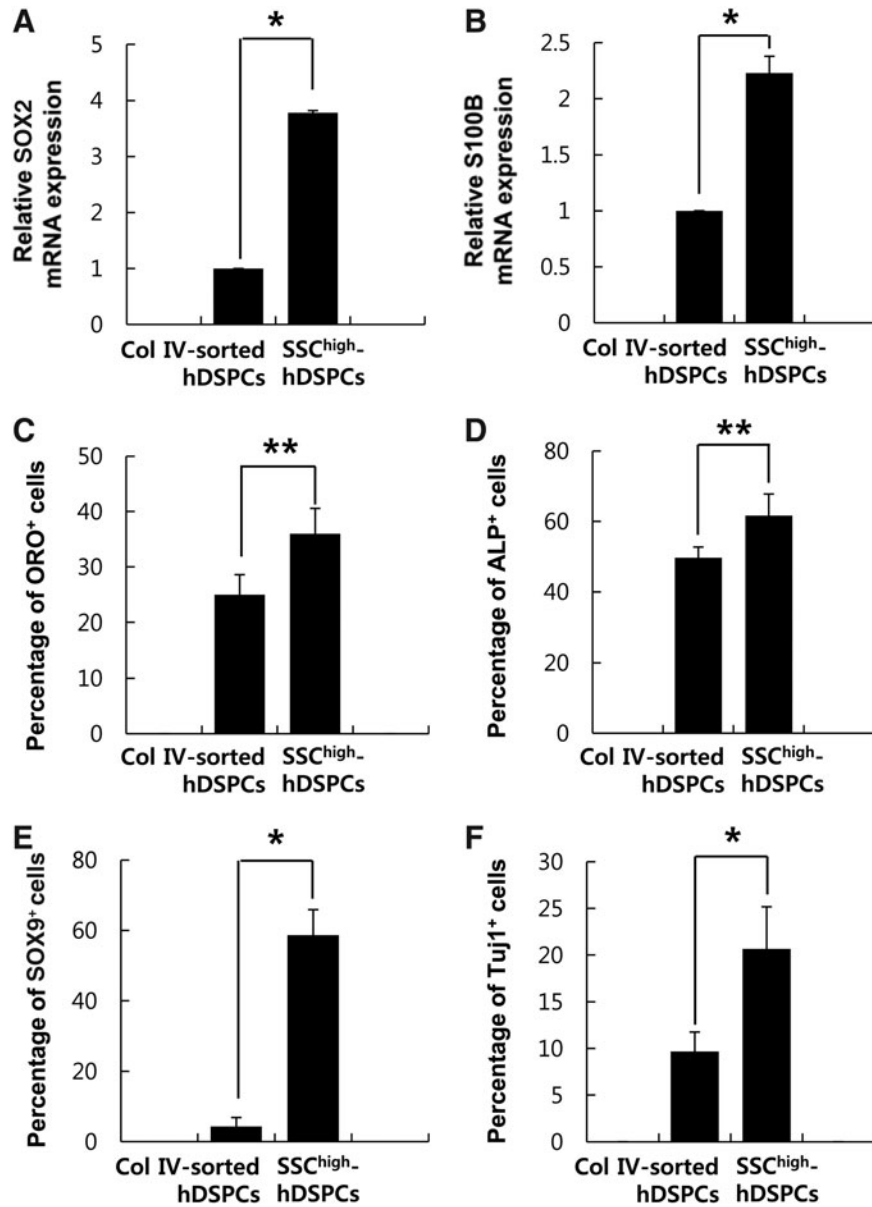

**SUPPLEMENTARY FIG. S5.** Comparison of collagen type IV-sorted hDSPCs and SSC<sup>high</sup>-hDSPCs for stemness. (A, B) Real-time RT-PCR analysis of the SKP markers, *SOX2* and *S100B*. Histochemical or immunofluorescence staining analysis demonstrating the effectiveness of different conditions. (C) Oil-Red-O staining. (D) Alkaline phosphatase staining. (E) SOX9. (F) Tuj1. \* $P < 0.01$ , \*\* $P < 0.05$ .
